# Supplementary figures and images for: A Case of Novel Meningoencephalomyelitis Associated With Vimentin IgG Autoantibodies
Source: Research Square preprint supplement (doi:10.21203/rs.3.rs-7202305/v1), 2025-08-08

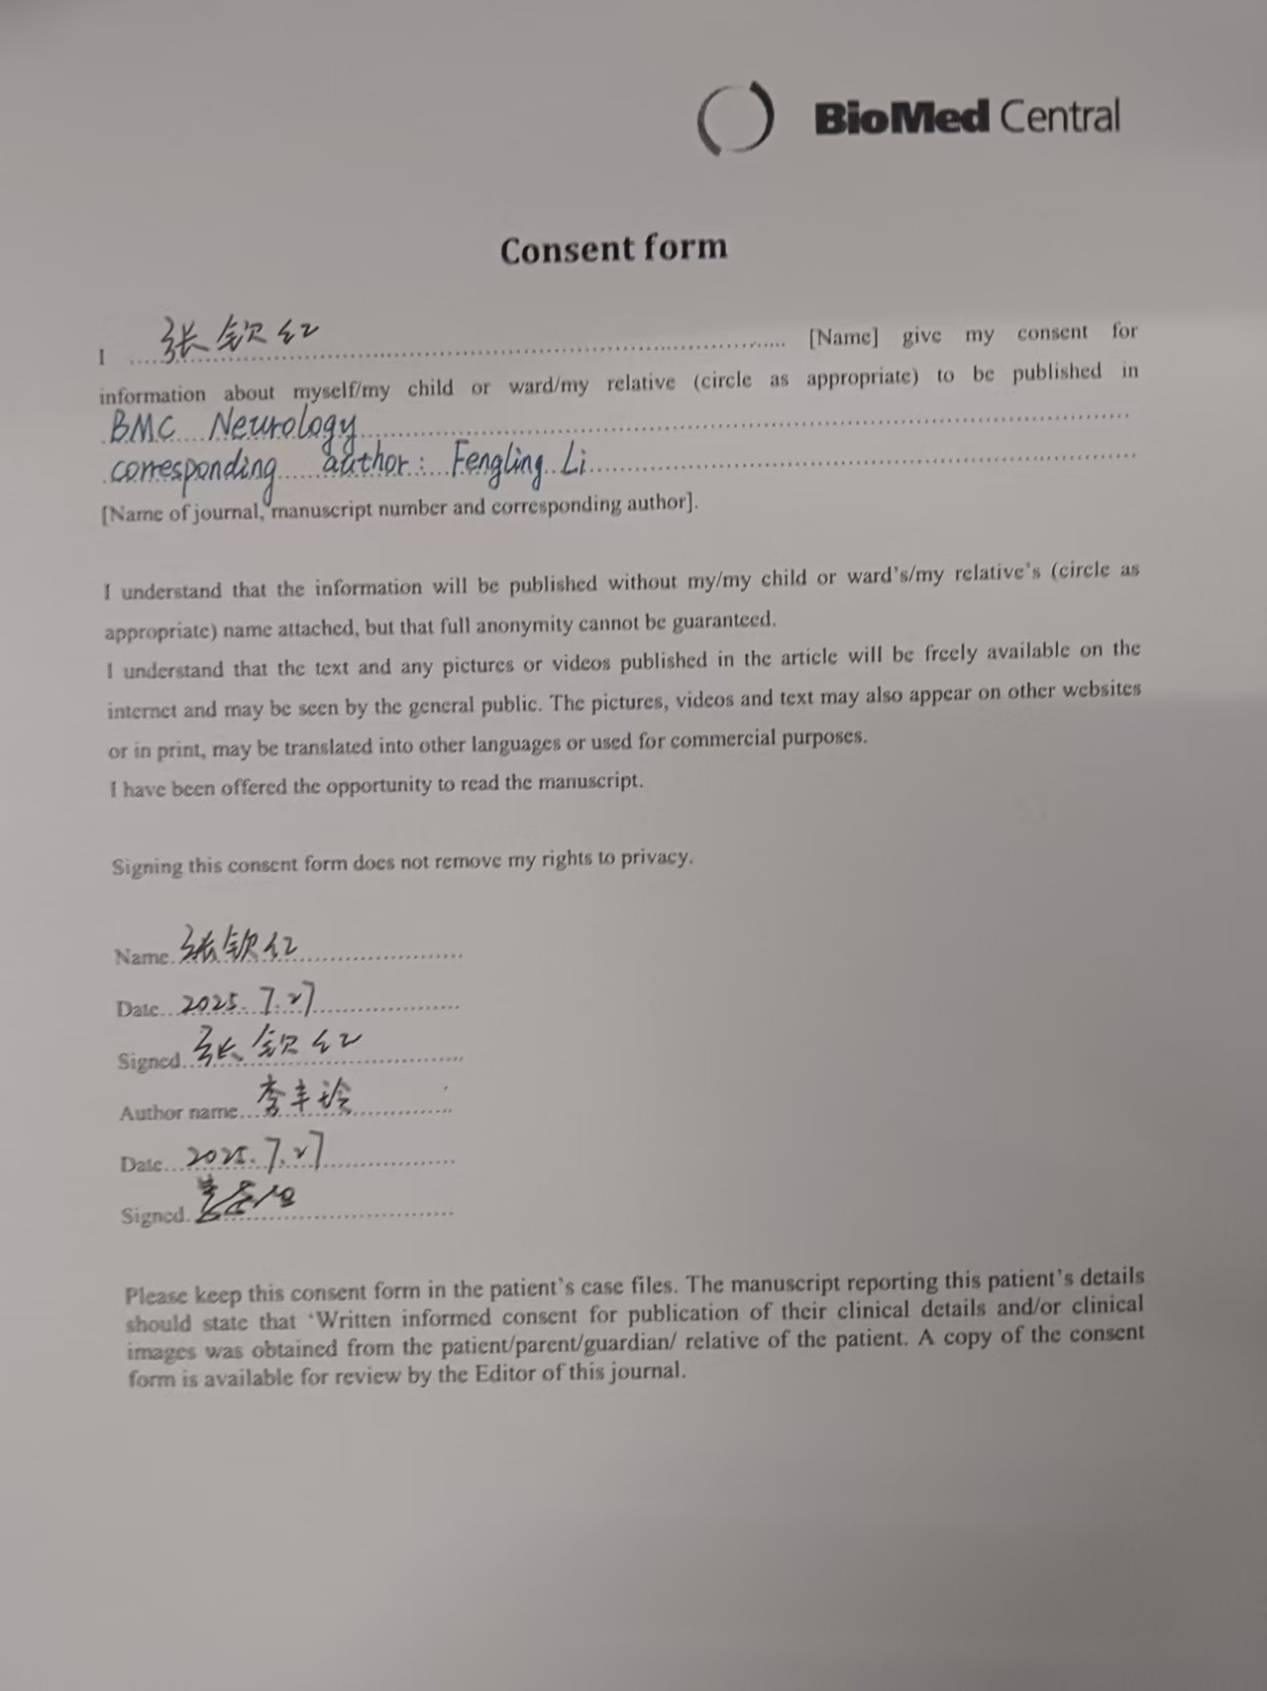

Supplement: Supplementary file 1 [file a39a2d378eb45f3c570f19e0.docx]
